# Supplementary material
Source: Springer Nature journal article supplement (https://www.springermedizin.de/resource/supplementary/13049_2013_729_MOESM5_ESM.pdf/9667238)
Supplement: MOESM5 [file 9667238]

# Incident characteristics

|    |                                                                                                                                                                                                                                                                                                                                                                                                                                                                                                                                                                                                                                                                                                                                                                                                                                                                                                                                                                                                                                                                                                                                                                                                                                                                                                                                                                                       |
|----|---------------------------------------------------------------------------------------------------------------------------------------------------------------------------------------------------------------------------------------------------------------------------------------------------------------------------------------------------------------------------------------------------------------------------------------------------------------------------------------------------------------------------------------------------------------------------------------------------------------------------------------------------------------------------------------------------------------------------------------------------------------------------------------------------------------------------------------------------------------------------------------------------------------------------------------------------------------------------------------------------------------------------------------------------------------------------------------------------------------------------------------------------------------------------------------------------------------------------------------------------------------------------------------------------------------------------------------------------------------------------------------|
| 12 | <p><b>What was the mechanism/external factor that caused the incident? Please tick for all options that apply.</b></p> <ul style="list-style-type: none"> <li><input type="checkbox"/> Transport accident</li> <li><input type="checkbox"/> Extreme weather</li> <li><input type="checkbox"/> Seismic incident</li> <li><input type="checkbox"/> Fire</li> <li><input type="checkbox"/> Mass gathering</li> <li><input type="checkbox"/> Explosive</li> <li><input type="checkbox"/> Industrial accident</li> <li><input type="checkbox"/> Nuclear or radiological incident</li> <li><input type="checkbox"/> Biological incident</li> <li><input type="checkbox"/> Chemical incident</li> <li><input type="checkbox"/> Other. Please specify</li> </ul> <p><i>If extreme weather please choose one of the options below:</i></p> <ul style="list-style-type: none"> <li><input type="checkbox"/> Avalanche</li> <li><input type="checkbox"/> Flooding</li> <li><input type="checkbox"/> Thunderstorm</li> <li><input type="checkbox"/> Hurricane</li> <li><input type="checkbox"/> Extreme heat</li> <li><input type="checkbox"/> Extreme cold</li> <li><input type="checkbox"/> Other. Please specify</li> </ul> <p><b>Is this incident coupled to another incident?</b></p> <p><input type="radio"/> Yes</p> <p><input type="radio"/> No</p> <p><i>If yes, which incident?</i></p> |
| 13 | <p><b>What was the location of the incident scene? Please tick for all options that apply.</b></p> <ul style="list-style-type: none"> <li><input type="checkbox"/> Urban area</li> <li><input type="checkbox"/> Rural/ countryside area</li> <li><input type="checkbox"/> Offshore/ maritime (ocean, river, lake)</li> <li><input type="checkbox"/> Mountain</li> <li><input type="checkbox"/> Road</li> <li><input type="checkbox"/> Airport</li> <li><input type="checkbox"/> Educational facility</li> <li><input type="checkbox"/> Public facility</li> <li><input type="checkbox"/> Health care facility</li> <li><input type="checkbox"/> Building</li> <li><input type="checkbox"/> Mass gathering</li> <li><input type="checkbox"/> Other/unknown</li> </ul> <p><i>If other please specify.</i></p>                                                                                                                                                                                                                                                                                                                                                                                                                                                                                                                                                                           |
| 14 | <p><b>What was the EMS' mode of access to treat patients at incident scene? Please tick for all options that apply.</b></p> <ul style="list-style-type: none"> <li><input type="checkbox"/> Wheeled vehicles</li> <li><input type="checkbox"/> Rail</li> <li><input type="checkbox"/> Air</li> <li><input type="checkbox"/> Boat</li> <li><input type="checkbox"/> Foot</li> <li><input type="checkbox"/> Other. Please specify</li> </ul> <p><i>For each ticked alternative please specify if there was a delay in accessing the patient in order to start evaluation/treatment and why this occurred.</i></p> <p><i>Reasons for delay could include reasons such as: security issues, congested roads due to traffic, weather conditions.</i></p>                                                                                                                                                                                                                                                                                                                                                                                                                                                                                                                                                                                                                                   |
| 15 | <p><b>What was the EMS' mode of evacuating patients from the incident scene? Please tick for all options that apply.</b></p> <ul style="list-style-type: none"> <li><input type="checkbox"/> Wheeled vehicles</li> <li><input type="checkbox"/> Rail</li> <li><input type="checkbox"/> Air</li> <li><input type="checkbox"/> Boat</li> <li><input type="checkbox"/> Foot</li> <li><input type="checkbox"/> Other. Please specify</li> </ul> <p><i>For each ticked alternative please specify if there was a delay in the evacuation of the patient/s and why this occurred.</i></p> <p><i>Reasons for delay could include reasons such as: entrapment, lack of transport capacity, weather conditions etc.</i></p>                                                                                                                                                                                                                                                                                                                                                                                                                                                                                                                                                                                                                                                                    |
| 16 | <p><b>Was there damage to infrastructure that affected EMS response? Please tick for all options that apply.</b></p> <ul style="list-style-type: none"> <li><input type="checkbox"/> Power</li> <li><input type="checkbox"/> Telecommunication</li> <li><input type="checkbox"/> Other modes of communication</li> <li><input type="checkbox"/> Road</li> <li><input type="checkbox"/> Rail</li> <li><input type="checkbox"/> Damage to the EMS or health structure</li> <li><input type="checkbox"/> Other damage. Please specify</li> </ul> <p><i>For each ticked alternative please state what the damage was and how it affected the EMS response.</i></p>                                                                                                                                                                                                                                                                                                                                                                                                                                                                                                                                                                                                                                                                                                                        |
| 17 | <p><b>How many sites required separate EMS infrastructure (such as on-scene leadership and casualty clearing stations) in the response phase?</b></p> <p>Please state whether the number is estimated or exact.</p>                                                                                                                                                                                                                                                                                                                                                                                                                                                                                                                                                                                                                                                                                                                                                                                                                                                                                                                                                                                                                                                                                                                                                                   |

|    |                                                                                                                                                                                                                                                                                                                                                                                                                                                                                                                                                                                                                                                          |
|----|----------------------------------------------------------------------------------------------------------------------------------------------------------------------------------------------------------------------------------------------------------------------------------------------------------------------------------------------------------------------------------------------------------------------------------------------------------------------------------------------------------------------------------------------------------------------------------------------------------------------------------------------------------|
| 18 | <p><b>Which hazards existed for rescuers on scene? Please tick for all options that apply.</b></p> <ul style="list-style-type: none"><li><input type="checkbox"/> On going violence or risk of further violence</li><li><input type="checkbox"/> Fire</li><li><input type="checkbox"/> Collapsing building/s</li><li><input type="checkbox"/> Climate</li><li><input type="checkbox"/> Lack of electricity</li><li><input type="checkbox"/> Lack of water/food</li><li><input type="checkbox"/> Other. Please specify</li></ul> <p><i>For each ticked alternative please specify what the hazard was and how it affected the rescuers on-scene.</i></p>  |
| 19 | <p><b>Which hazards existed for patients on scene? Please tick for all options that apply.</b></p> <ul style="list-style-type: none"><li><input type="checkbox"/> On going violence or risk of further violence</li><li><input type="checkbox"/> Fire</li><li><input type="checkbox"/> Collapsing building/s</li><li><input type="checkbox"/> Climate</li><li><input type="checkbox"/> Lack of electricity</li><li><input type="checkbox"/> Lack of water/food</li><li><input type="checkbox"/> Other. Please specify</li></ul> <p><i>Fore each ticked alternative please specify what the hazard was and how it affected the patients on-scene.</i></p> |
